# Supplementary material for: CDH26 amplifies airway epithelial IL-4 receptor α signaling in asthma
Source: bioRxiv or medRxiv preprint supplement (doi:10.1101/2020.12.01.20241752), 2020-12-02
Supplement: Supplementary file [file media-1.pdf]

**SUPPORTING INFORMATION:**

**CDH26 amplifies airway epithelial IL-4 receptor  $\alpha$  signaling in asthma**

**Yuchen Feng<sup>1,2\*</sup>, Shengchong Chen<sup>1,2\*</sup>, Chenli Chang<sup>1,2</sup>, Wenliang Wu<sup>1,2</sup>, Dian Chen<sup>1,2</sup>, Jiali Gao<sup>1,2</sup>, Gongqi Chen<sup>1,2</sup>, Lingling Yi<sup>1,2†</sup>, Guohua Zhen<sup>1,2†</sup>**

1 Division of Respiratory and Critical Care Medicine, Department of Internal Medicine, Tongji Hospital, Tongji Medical College, Huazhong University of Science and Technology, Wuhan 430030, China;

2 Key Laboratory of Respiratory Diseases, National Health Commission of People's Republic of China, Wuhan 430030, China;

\*These authors contributed equally to this work.

†Correspondence to: Guohua Zhen, Division of Pulmonary and Critical Care Medicine, Tongji Hospital, 1095 Jiefang Avenue, Wuhan 430030, China; e-mail: ghzhen@tjh.tjmu.edu.cn. Lingling Yi, Division of Pulmonary and Critical Care Medicine, Tongji Hospital, 1095 Jiefang Avenue, Wuhan 430030, China; e-mail: yilingling20061281@163.com

## **SUPPLEMENTARY METHODS**

### **Histology and immunofluorescence staining**

For immunofluorescence staining, tissue sections were incubated with anti-CDH26 antibody (Sigma-Aldrich Chemie GmbH, Munich, Germany, 1:100 dilution) and then incubated with Cy3 donkey anti-rabbit secondary antibody (Boster, Wuhan, China). Double staining was performed in immunofluorescence staining by using two different host species antibodies. The combinations of the primary antibodies include CDH26 (Sigma-Aldrich, 1:100 dilution) with human IL-4R $\alpha$  antibody (R&D system, 1:20 dilution), CDH26 (Sigma-Aldrich, 1:100 dilution) with mouse IL-4R $\alpha$  antibody (R&D system, 1:200 dilution). Paraffin tissue sections were deparaffinization, rehydration, and processed with pH9.0 Tris-EDTA retrieval buffer (Servicebio, Wuhan, China) before blocking with 10% donkey serum. Paraffin tissue sections were incubated with primary antibodies at 4°C overnight and then incubated with Cy3 or FITC conjugated secondary antibodies (donkey-anti mouse or rabbit IgG, Wuhan, China) at 1:200 in the dark for 1 hour at room temperature. Nuclei were stained with DAPI (Servicebio, Wuhan, China). All photographs were taken by using a fluorescence microscope (Olympus Corporation, Japan).

### **Assessment of airway inflammation**

Cell counts for macrophages, eosinophils, lymphocytes, and neutrophils in bronchoalveolar lavage fluid (BALF) were performed. The severity of peri-bronchial inflammation in H&E-stained mouse lung sections was scored using the following features: 0, normal; 1, few cells; 2, a ring of inflammatory cells (1 cell layer deep); 3, a

ring of inflammatory cells (2–4 cells deep); 4, a ring of inflammatory cells (> 4 cells deep).

### **Periodic acid-Schiff (PAS) staining**

Lung sections were stained with PAS (Servicebio, Wuhan, China) for detection of mucus. The number of PAS-staining-positive cells was counted in five random fields for each lung section at 200× magnification.

### **The sequence of CDH26 siRNA**

The sequence of CDH26 siRNA (sense strand) was: 5'-GGGACUUUCCCAGAA GCAATTUUGCUUCUGGGAAAGUCCCTT-3'. The sequence of negative control siRNA was: sense: 5'-UUCUCCGAACGUACGUTT-3'; antisense: 5'-ACGUG ACACGUUCGGAGAATT-3'.

## SUPPLEMENTARY TABLES

**Table S1. Subject characteristics.**

|                               | Healthy controls | Asthma patients | P value |
|-------------------------------|------------------|-----------------|---------|
| Number                        | 17               | 56              |         |
| Age, y                        | 35.94+9.43       | 38.09+11.33     | 0.574   |
| Sex, M: F, %F                 | 5:12, 70.6       | 13:45, 80.4     | 0.604   |
| Body mass index               | 22.15+3.32       | 22.33+3.19      | 0.716   |
| FEV <sub>1</sub> , %predicted | 89.82+32.63      | 79.15+19.89     | 0.007   |
| Methacholine PD20, mg         | 2.505+0          | 0.177+0.34      | <0.0001 |
| Sputum eosinophil, %          | 1.63+2.77        | 17.03+18.85     | <0.0001 |
| FeNO, ppb                     | 15.612+11.10     | 100.80+60.84    | <0.0001 |

Note: Values were presented as mean  $\pm$  SD.

Abbreviations: FeNO, fraction of exhaled nitric oxide; FEV<sub>1</sub>, forced expiratory volume in the first second; PD20, provocative dosage required to cause a 20% decline in FEV<sub>1</sub>. The minimal and maximal provocative dosages were 0.01 and 2.505 mg, respectively.

**Table S2. Primers for quantitative PCR**

| <b>Gene</b>    | <b>Species</b> | <b>Primer sequence (5'-3')</b> |                          |
|----------------|----------------|--------------------------------|--------------------------|
| GUSB           | Human          | Forward                        | GTCTGCGGCATTTTGTCGG      |
|                |                | Reverse                        | CACACGATGGCATAGGAATGG    |
| GAPDH          | Human          | Forward                        | AAGGTGAAGGTCGGAGTCAAC    |
|                |                | Reverse                        | GGGGTCATTGATGGCAACAATA   |
| CDH26          | Human          | Forward                        | CCTACCTCACGTCTACAGCGA    |
|                |                | Reverse                        | TTGAACCCAAAGAGTCCAGCA    |
| IL-4R $\alpha$ | Human          | Forward                        | AAATCGTGAAC TTTGTCTCCGT  |
|                |                | Reverse                        | CCCAGTGCCCTCTACTCTCAT    |
| MUC5AC         | Human          | Forward                        | CGACA ACTACTTCTGCGGTGC   |
|                |                | Reverse                        | GCACTCATCCTTCCTGTCGTT    |
| MUC5B          | Human          | Forward                        | CCCGTGTTGTCATCAAGGC      |
|                |                | Reverse                        | CAGGTCTGGTTGGCGTATTTG    |
| CCL26          | Human          | Forward                        | TTGAGGCTGAGCCAAAGACC     |
|                |                | Reverse                        | GCCCTTCTCAGGTTTCTCCC     |
| CCL24          | Human          | Forward                        | ACATCATCCCTACGGGCTCT     |
|                |                | Reverse                        | CTTGGGGTCGCCACAGAAC      |
| CCL11          | Human          | Forward                        | GAAAGCTGTGATCTTCAAGACC   |
|                |                | Reverse                        | GGCTTTGGAGTTGGAGATTTTT   |
| Gapdh          | Mouse          | Forward                        | AGAGAGGCCAGCTACTCG       |
|                |                | Reverse                        | GGCACTGCACAAGAAGATGC     |
| Cdh26          | Mouse          | Forward                        | CCAGCAGAAATCCTTCCAAGGAG  |
|                |                | Reverse                        | CGATCCAAGAGAAGATGGGTTCTC |
| Il-4R $\alpha$ | Mouse          | Forward                        | TGACCTCACAGGAACCCAGGC    |
|                |                | Reverse                        | GAACAGGCAAAACAACGGGAT    |
| Muc5ac         | Mouse          | Forward                        | CAGGACTCTCTGAAATCGTACCA  |
|                |                | Reverse                        | GAAGGCTCGTACCACAGGG      |
| Muc5b          | Mouse          | Forward                        | CTACTCGAACTGCTTGTTTGAC   |
|                |                | Reverse                        | CTTG TAGCAA ACTTTGTCCCTC |
| Ccl26          | Mouse          | Forward                        | ATCCCATGGAGCTGGGTGTA     |
|                |                | Reverse                        | CCTGGCTGGACACAGAATTG     |
| Ccl24          | Mouse          | Forward                        | CAGCCTTCTAAAGGGGCCAA     |
|                |                | Reverse                        | GCTGGTCTGTCAAACCCCAA     |
| Ccl11          | Mouse          | Forward                        | CAACAGATGCACCCTGAAAGC    |
|                |                | Reverse                        | TGATATTCCCTCAGAGCACGTCTT |
| Il-4           | Mouse          | Forward                        | GTCATCCTGCTCTTCTTTCTCG   |
|                |                | Reverse                        | CTCTCTGTGGTGTTCTTCGTTG   |
| Il-13          | Mouse          | Forward                        | CTGAGCAACATCACACAAGACC   |
|                |                | Reverse                        | AATCCAGGGCTACACAGAACC    |

## SUPPLEMENTARY FIGURES

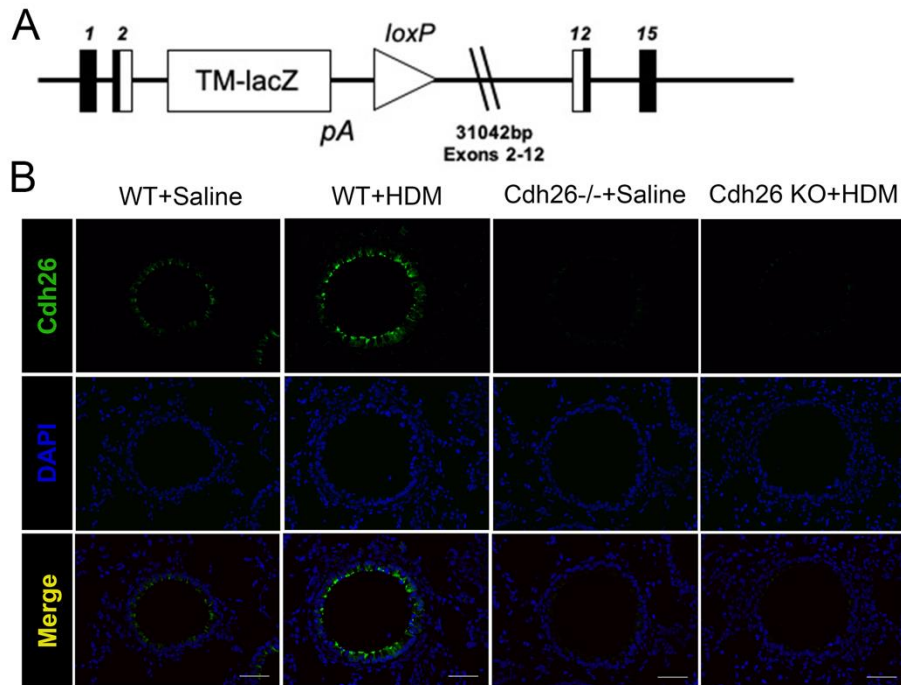

**Figure S1. Generation of *Cdh26*<sup>-/-</sup> mice. A)** Primer Strategy and scheme of *Cdh26*<sup>-/-</sup> mice. Exon 2 to exon 12 of *cdh26* gene including 31,042 base pair was knocked out. **B)** Representative images of Cdh26 immunofluorescence staining in mouse lung sections. Scale bar, 50  $\mu$ m. n =5-8 mice per group.

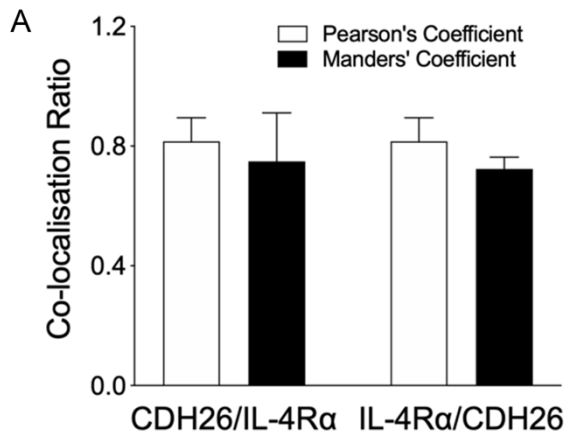

**Figure S2. Cdh26 and Il-4R are co-located in airway epithelium in mouse.**

Quantitative analysis of protein colocalization between Cdh26 and Il-4Rα proteins by Pearson and Manders' coefficients. Colocalization of Cdh26 and Il-4Rα were analyzed using ImageJ plug-in Coloc2. Data are mean  $\pm$  SD.

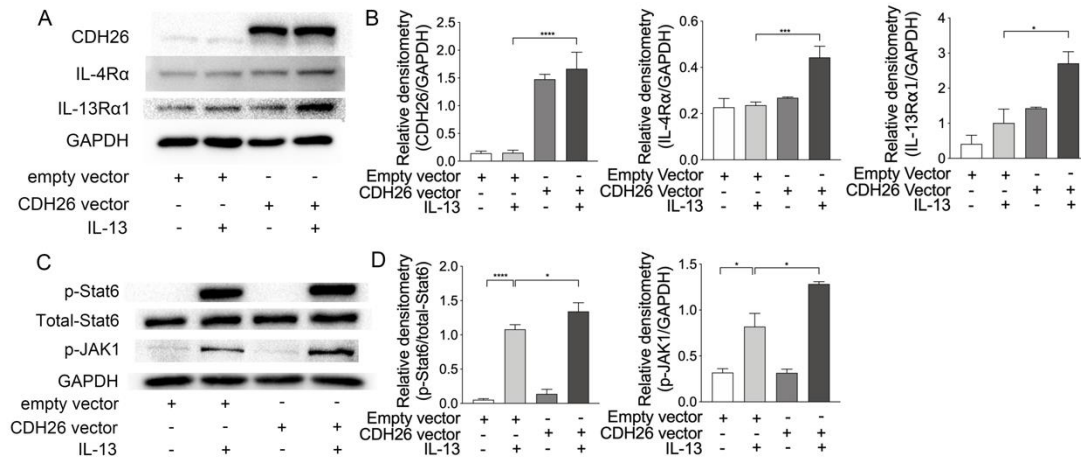

**Figure S3. CDH26 promotes IL-13-induced IL-4Rα expression, JAK-1 and Stat6 phosphorylation.** **A)** The protein levels of IL-4Rα, IL-13Rα1 in BEAS-2B cells after transfection with empty or CDH26 cDNA expression vector with or without IL-13 stimulation at 48h were detected by Western blotting. **B)** Densitometry assay of the Western blotting results was analyzed using ImageJ. **C)** IL-13 stimulation increased JAK1 and STAT6 phosphorylation at 30min, and CDH26 vector transfection contributed IL-13-induced JAK1 and STAT6 phosphorylation. Densitometry of phospho-JAK1 relative to total GAPDH and phosphor-STAT6 relative to total STAT6. **D)** Densitometry assay of the Western blotting results was analyzed using ImageJ. The data are representative of three independent experiments. Data are mean ± SD. \*P < 0.05; \*\*P < 0.01; \*\*\*P < 0.001; \*\*\*\*P < 0.0001(one-way ANOVA followed by Tukey's multiple comparison test).



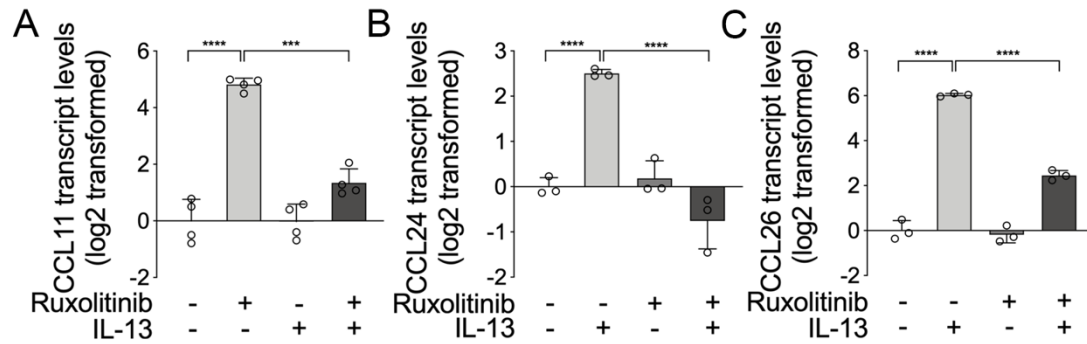

**Figure S4. Selective JAK1/2 inhibitor Ruxolitinib blocked IL-13-induced CCL11, CCL24, CCL26 transcript expression.** A-C) BEAS-2B cells were treated with vehicle or ruxolitinib (100nM) with or without IL-13 (20ng/mL) stimulation for 48h. The mRNA levels of *CCL11* (A), *CCL24* (B), *CCL26* (C) in BEAS-2B cells were determined by quantitative PCR. The transcript level was expressed as log2 transformed and relative to the mean of control group. n = 3-4 wells per group. Data are mean  $\pm$  SD. \*P < 0.05; \*\*P < 0.01; \*\*\*P < 0.001; \*\*\*\*P < 0.0001 (one-way ANOVA followed by Tukey's multiple comparison test).

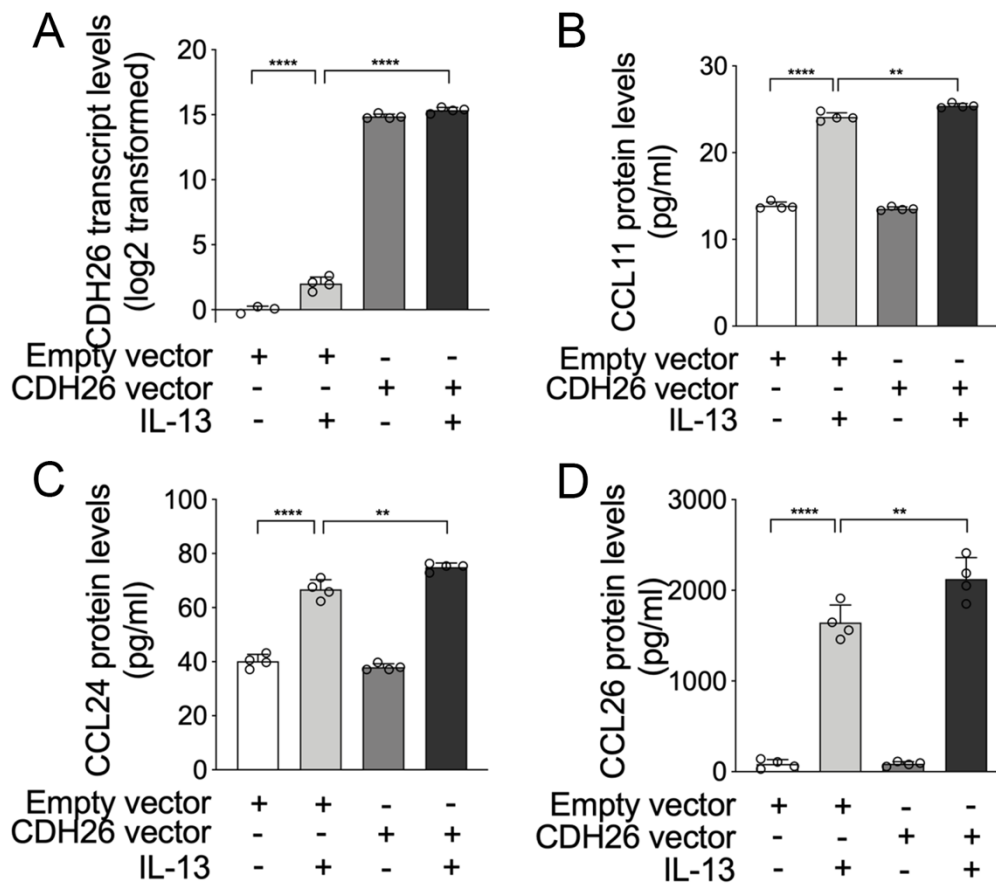

**Figure S5. CDH26 regulates Eotaxin-1, Eotaxin-2, Eotaxin-3 expression in human bronchial epithelial cells.** **A)** The transcript levels of *CDH26* after transfection with empty or CDH26 cDNA expression vector with or without IL-13 (20ng/mL) stimulation for 48h were detected by quantitative PCR. **B-D)** The protein levels of CCL11 (**B**), CCL24 (**C**) and CCL26 (**D**) in cell culture media after transfection empty or CDH26 cDNA expression vector with or without IL-13 stimulation were detected by ELISA. n = 4 wells per group. Data are mean  $\pm$  SD. \*P < 0.05; \*\*P < 0.01; \*\*\*P < 0.001; \*\*\*\*P < 0.0001(one-way ANOVA followed by Tukey's multiple comparison test).
